# Supplementary material for: The Regulation of Nitrate Reductases in Response to Abiotic Stress in Arabidopsis
Source: MDPI journal article supplement (doi:10.3390/ijms23031202), 2022-01-21
Supplement: s1 [file s1]

Supplement Figure

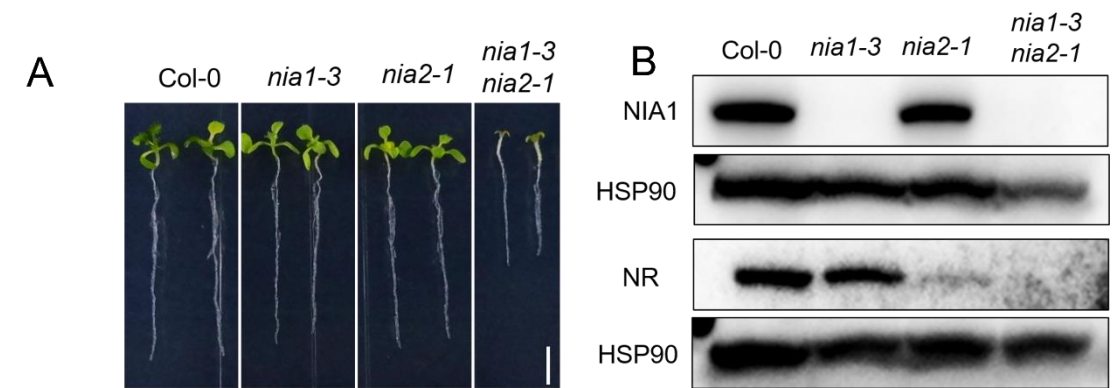

**Figure S1.** The null-allele mutant *nia1nia2* was lethal.

A. The phenotype of the seedlings in indicated background. The scale bar is 0.5cm.

B. Western blot of the proteins extracted from samples in A by NIA1 antibody and NR antibody to test their specialty.

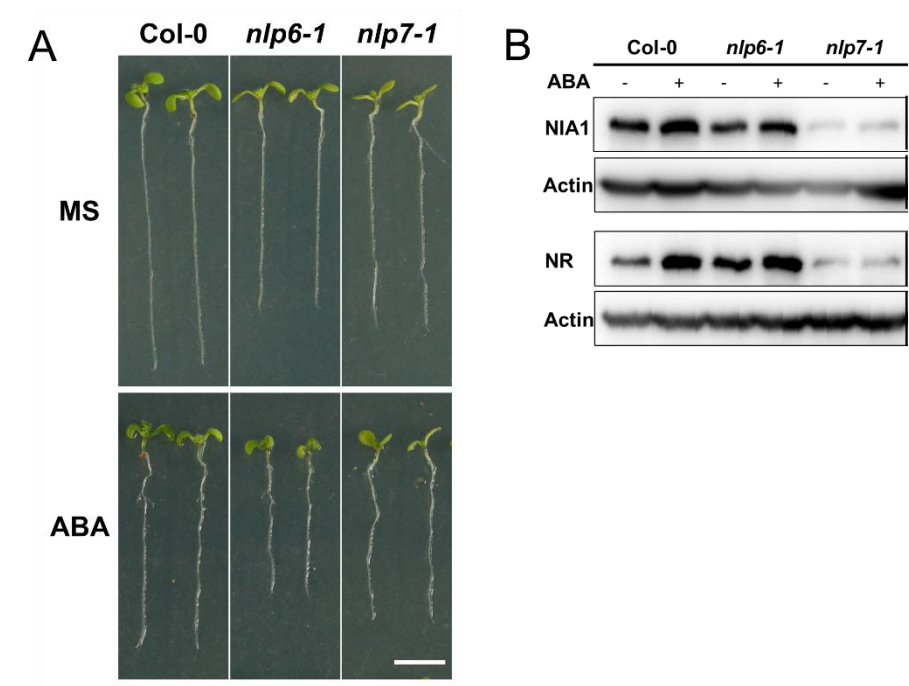

**Figure S2.** Transcription regulation was less important in response to ABA.

A. The phenotype of the 10-day-old green seedlings in indicated background with or without ABA treatments. The scale bar is 0.5 cm.

B. Western blot of the proteins extracted from samples in A by NIA1 antibody and NR antibody.
